# Supplementary material for: Improve Ocean Modelling Software NEMO 4.0 benchmarking and communication efficiency
Source: Copernicus journal article supplement (doi:10.5194/gmd-2021-320), 2021-10-21

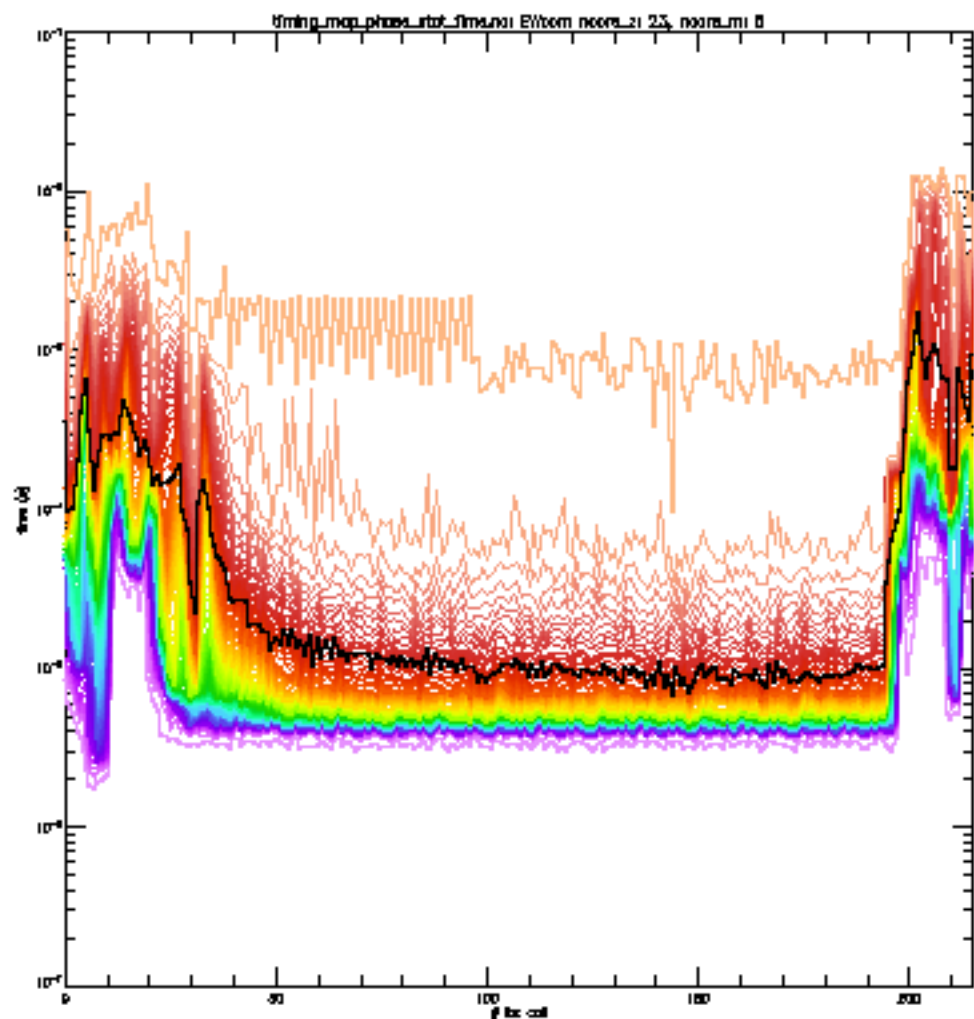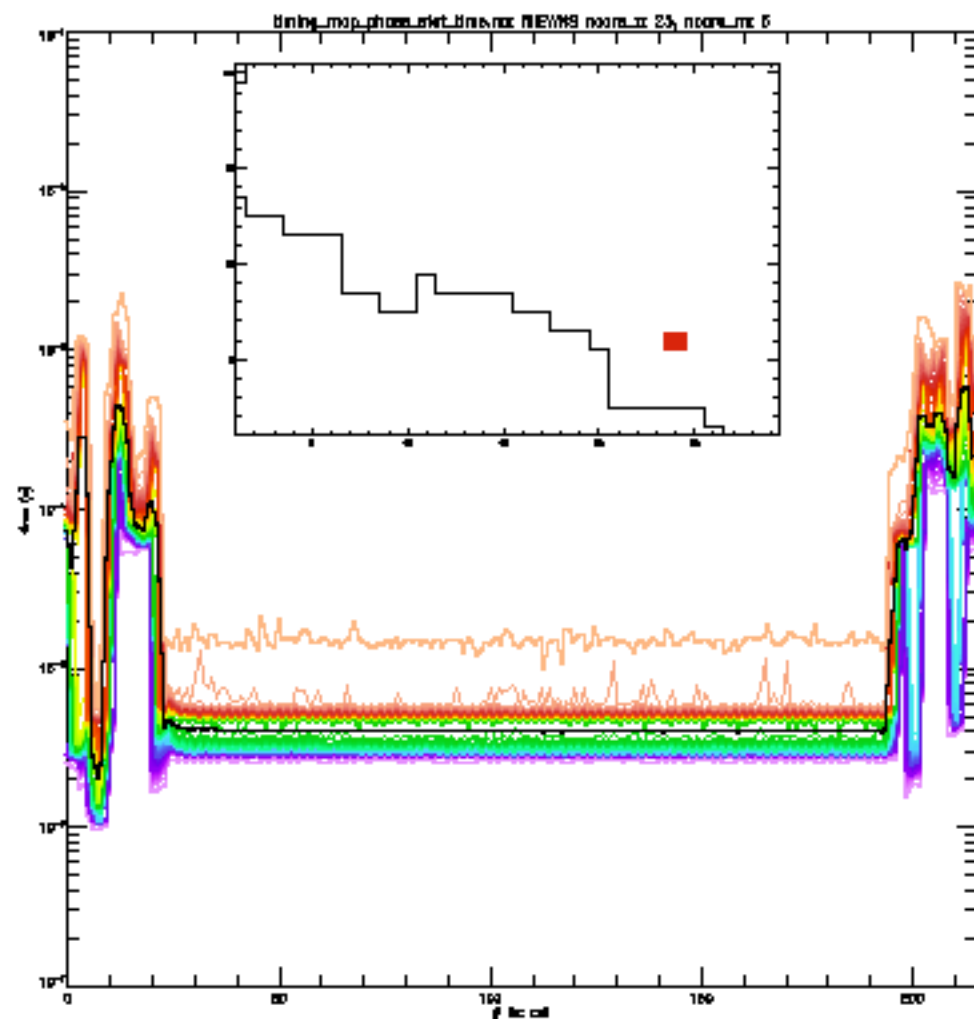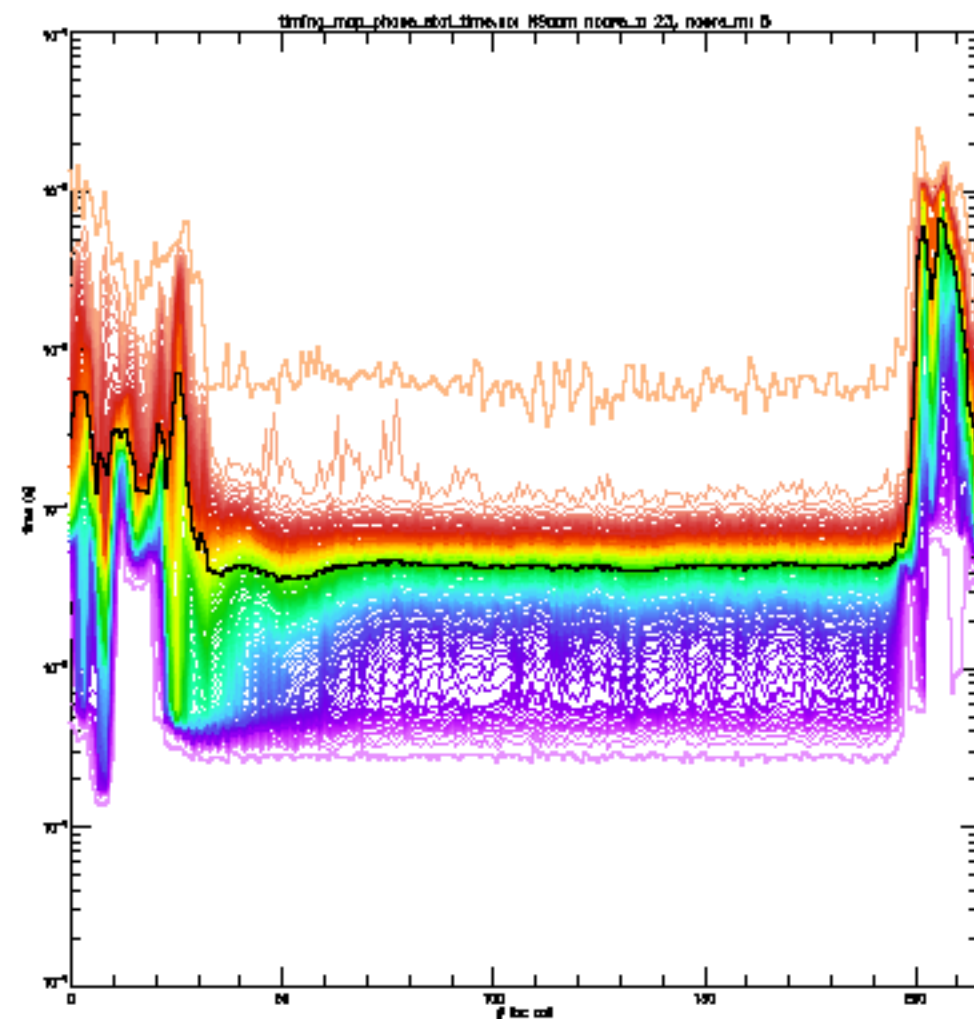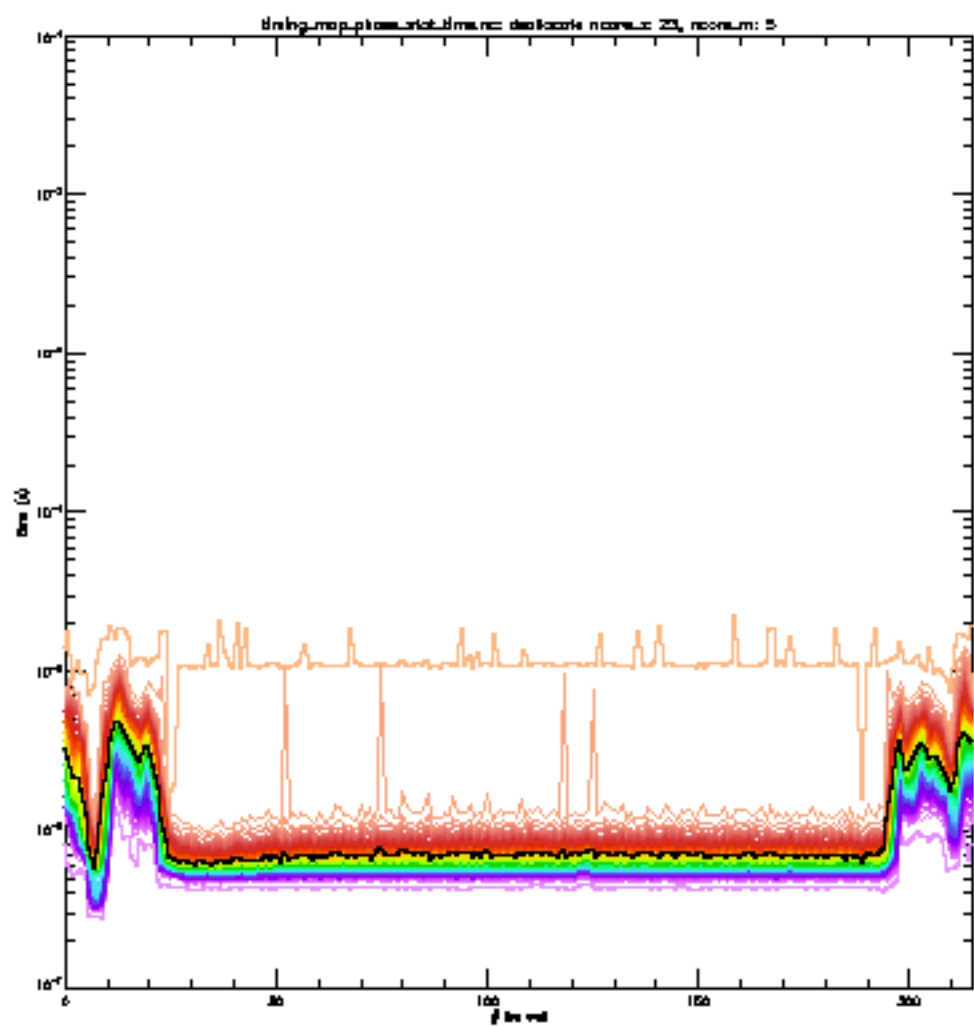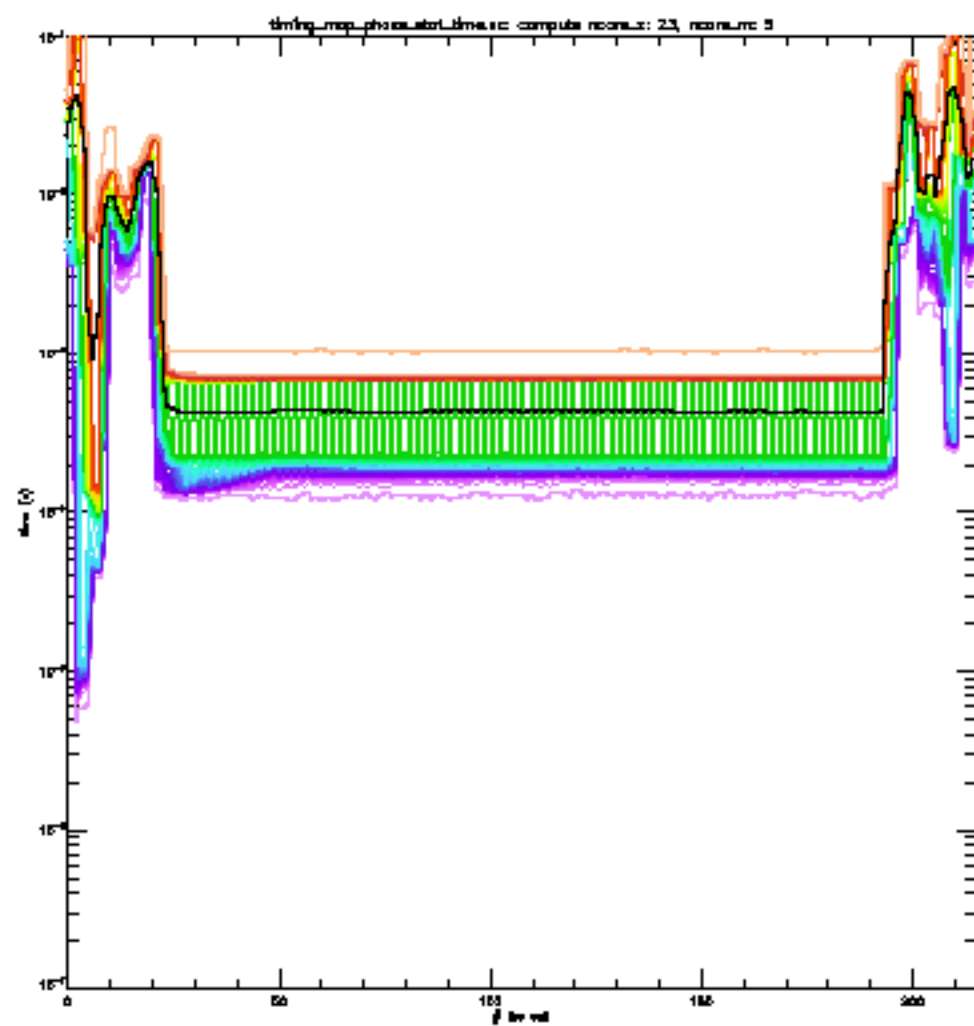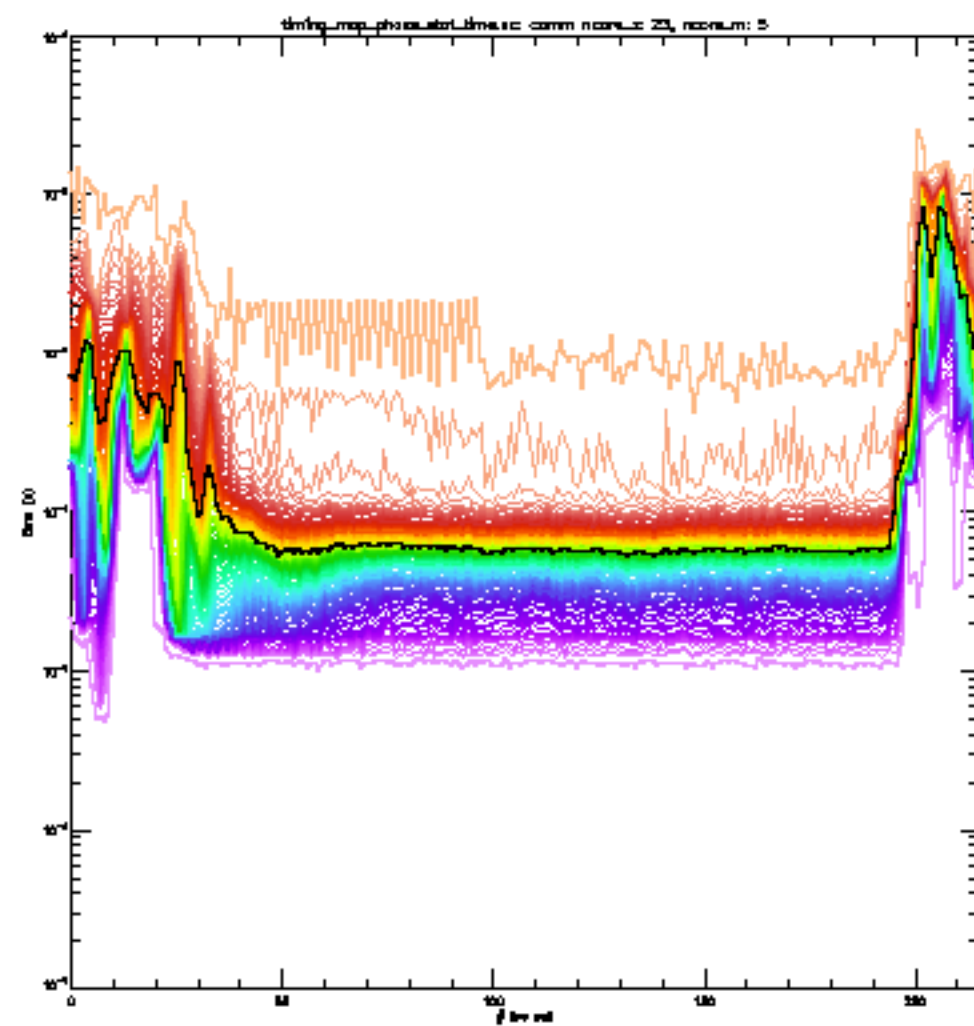

Supplement: Supplementary file [file gmd-2021-320-AC3-supplement.pdf]
